# Supplementary material
Source: PubMed Central journal article supplement (PMC7755299)
Supplement: NIHMS1653617-supplement-1.pdf [file NIHMS1653617-supplement-1.pdf]

**Supplementary Table 1:** Statistical analysis of the ECA, Number of fragments and mTICI score by stroke etiology.

| Suspected Etiology                            | Mean Extracted Clot Burden (mm <sup>2</sup> ) | Mean Number of Fragments | Mean Number of Passes   | Final TICI Score        |      |
|-----------------------------------------------|-----------------------------------------------|--------------------------|-------------------------|-------------------------|------|
|                                               |                                               |                          |                         | (0-2b)                  | 2c-3 |
| Cardioembolic                                 | 52.41                                         | 3.72                     | 2.20                    | 57                      | 140  |
| Large Artery                                  | 108.95                                        | 5.36                     | 2.65                    | 54                      | 56   |
| ESUS                                          | 46.84                                         | 3.52                     | 2.34                    | 44                      | 99   |
| Other                                         | 51.75                                         | 3.73                     | 2.30                    | 11                      | 22   |
| <b><u>Statistical Analysis:</u></b>           |                                               |                          |                         |                         |      |
| Suspected Etiology                            | Total Number (N)                              | Test Statistic (H)       | Degrees of Freedom (DF) | Significance (p<0.050*) |      |
| Mean Extracted Clot Burden (mm <sup>2</sup> ) | 483                                           | 24.62                    | 3                       | p < 0.001*              |      |
| Mean Number of Fragments                      | 483                                           | 10.62                    | 3                       | p = 0.014*              |      |
| mTICI                                         | 483                                           | 10.66                    | 3                       | p = 0.014*              |      |
